# Supplementary material for: Missing call bias in high-throughput genotyping
Source: PubMed Central journal article supplement (PMC2670840; doi:10.1186/1471-2164-10-106), 2009-03-13

# Changes of Allele Frequency Estimation

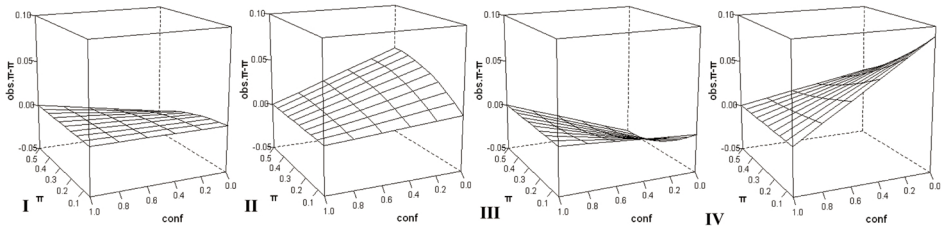

## Multiplicative Disease Model

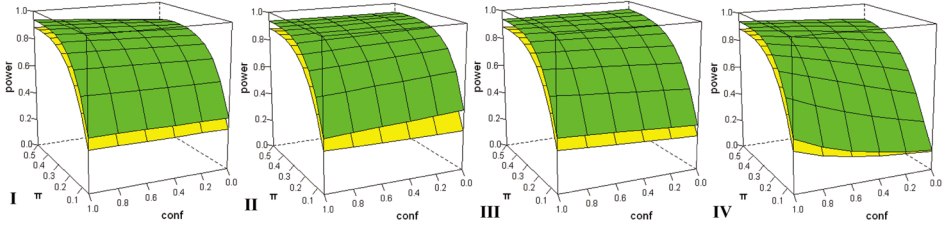

## Dominant Disease Model

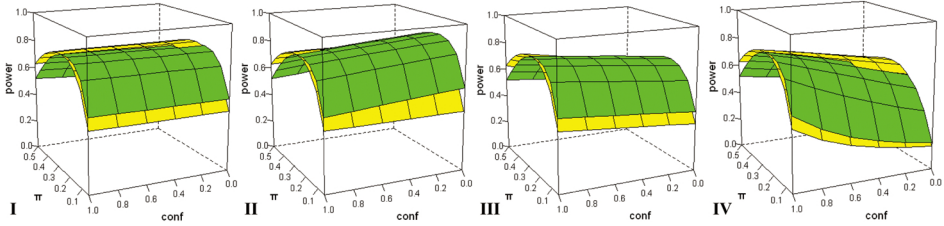

## Recessive Disease Model

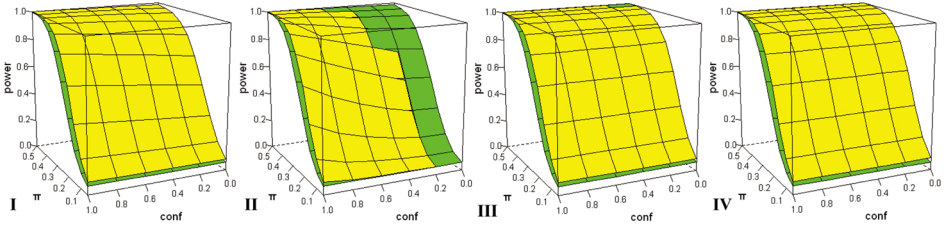

## Overdominant Disease Model

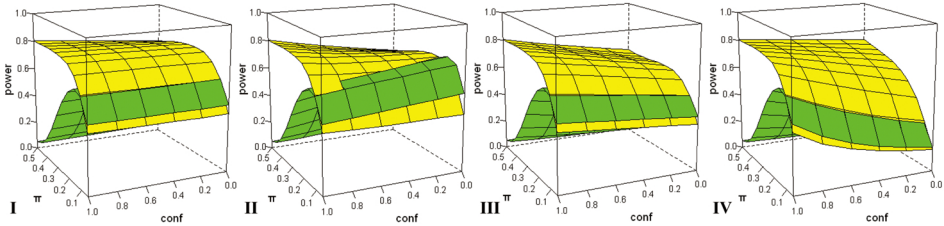

## Additive Disease Model

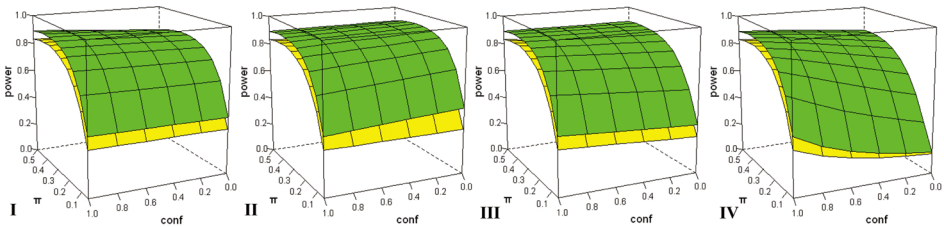

Supplement: 1471-2164-10-106-S3.pdf [file 1471-2164-10-106-S3.pdf]
