# Supplementary material for: Missing call bias in high-throughput genotyping
Source: PubMed Central journal article supplement (PMC2670840; doi:10.1186/1471-2164-10-106), 2009-03-13

### Dominant Disease Model

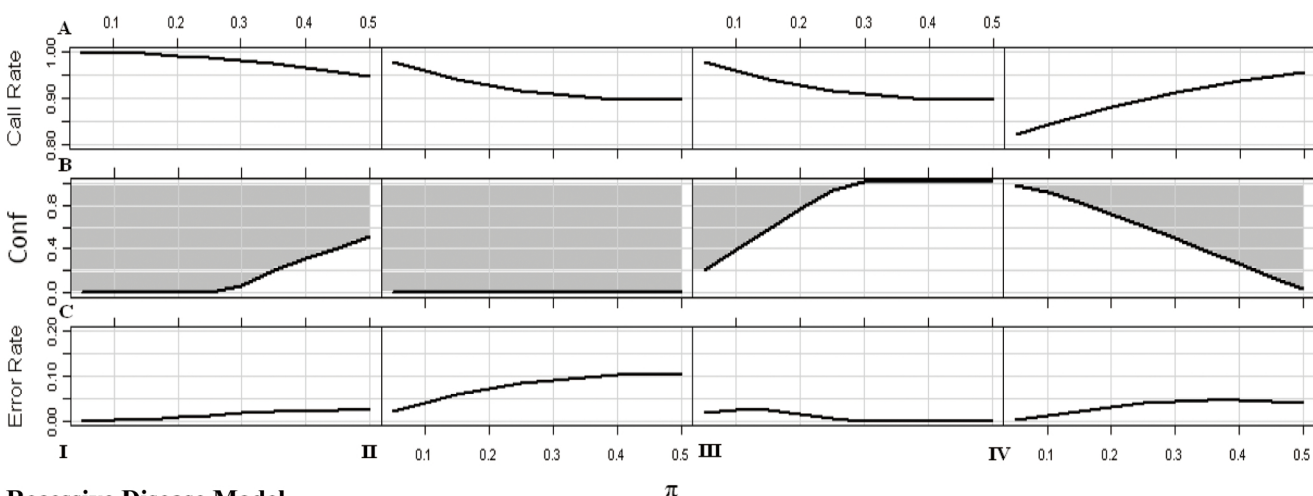

### Recessive Disease Model

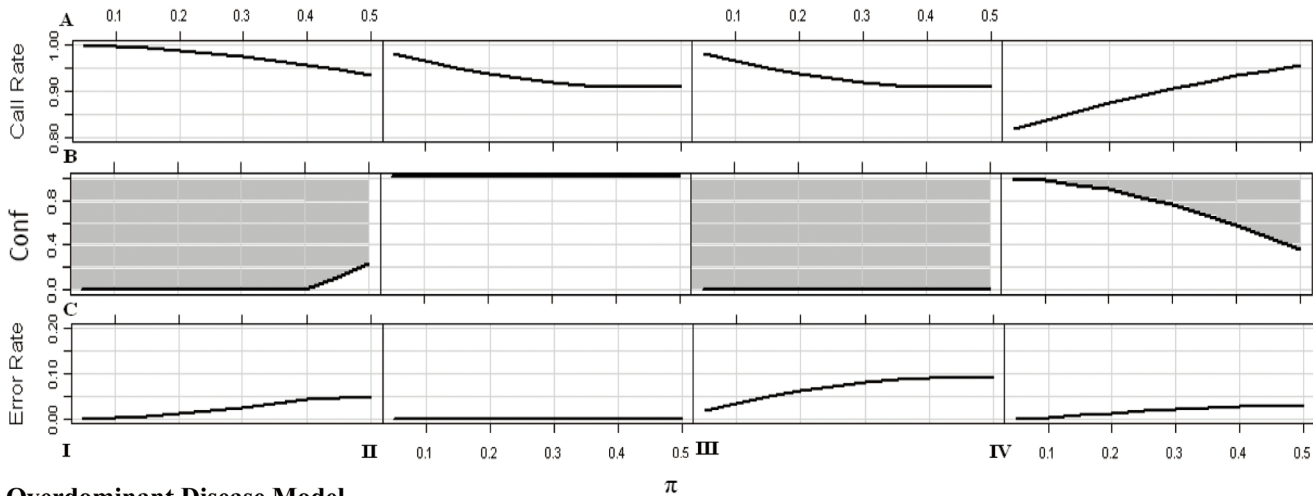

### Overdominant Disease Model

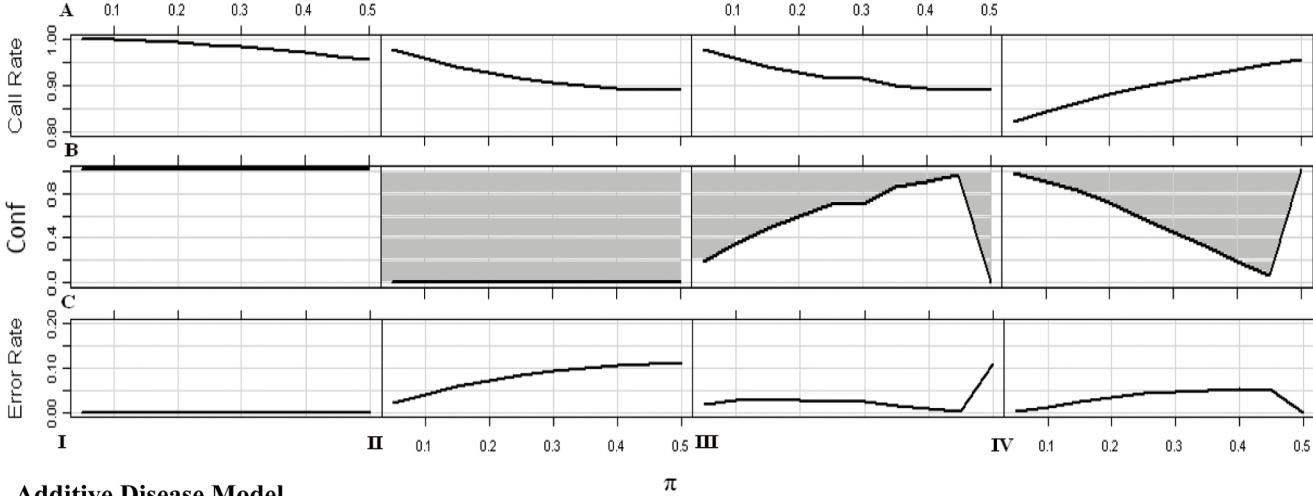

### Additive Disease Model

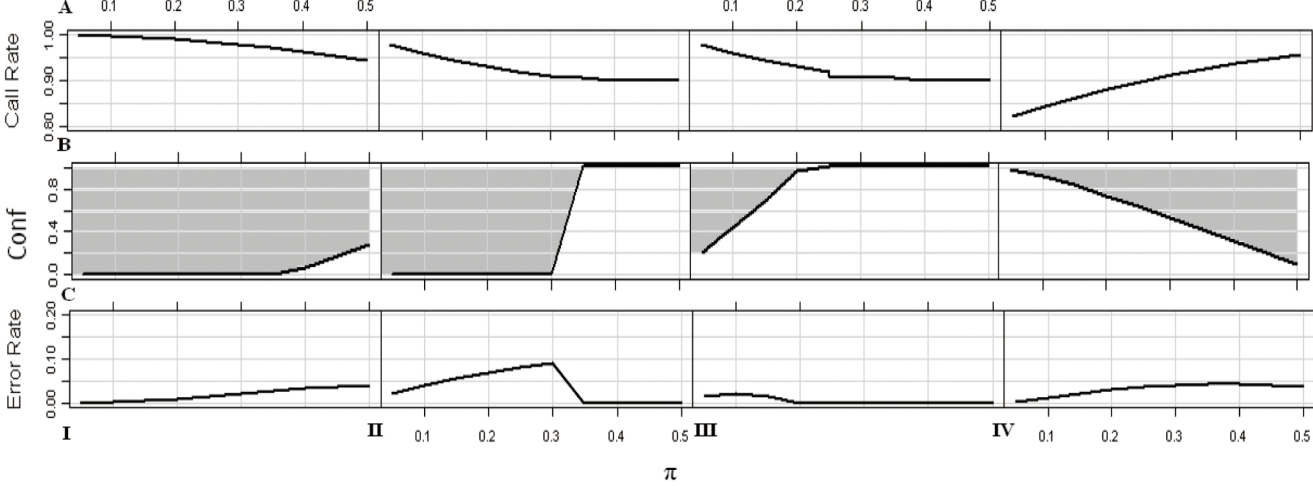

Supplement: 1471-2164-10-106-S4.pdf [file 1471-2164-10-106-S4.pdf]
