# Supplementary material for: Missing call bias in high-throughput genotyping
Source: PubMed Central journal article supplement (PMC2670840; doi:10.1186/1471-2164-10-106), 2009-03-13

— Conf=0.0    — Conf=0.25    — Conf=0.5    — Conf=0.75    — Conf=1.0

**Dominant Disease Model**

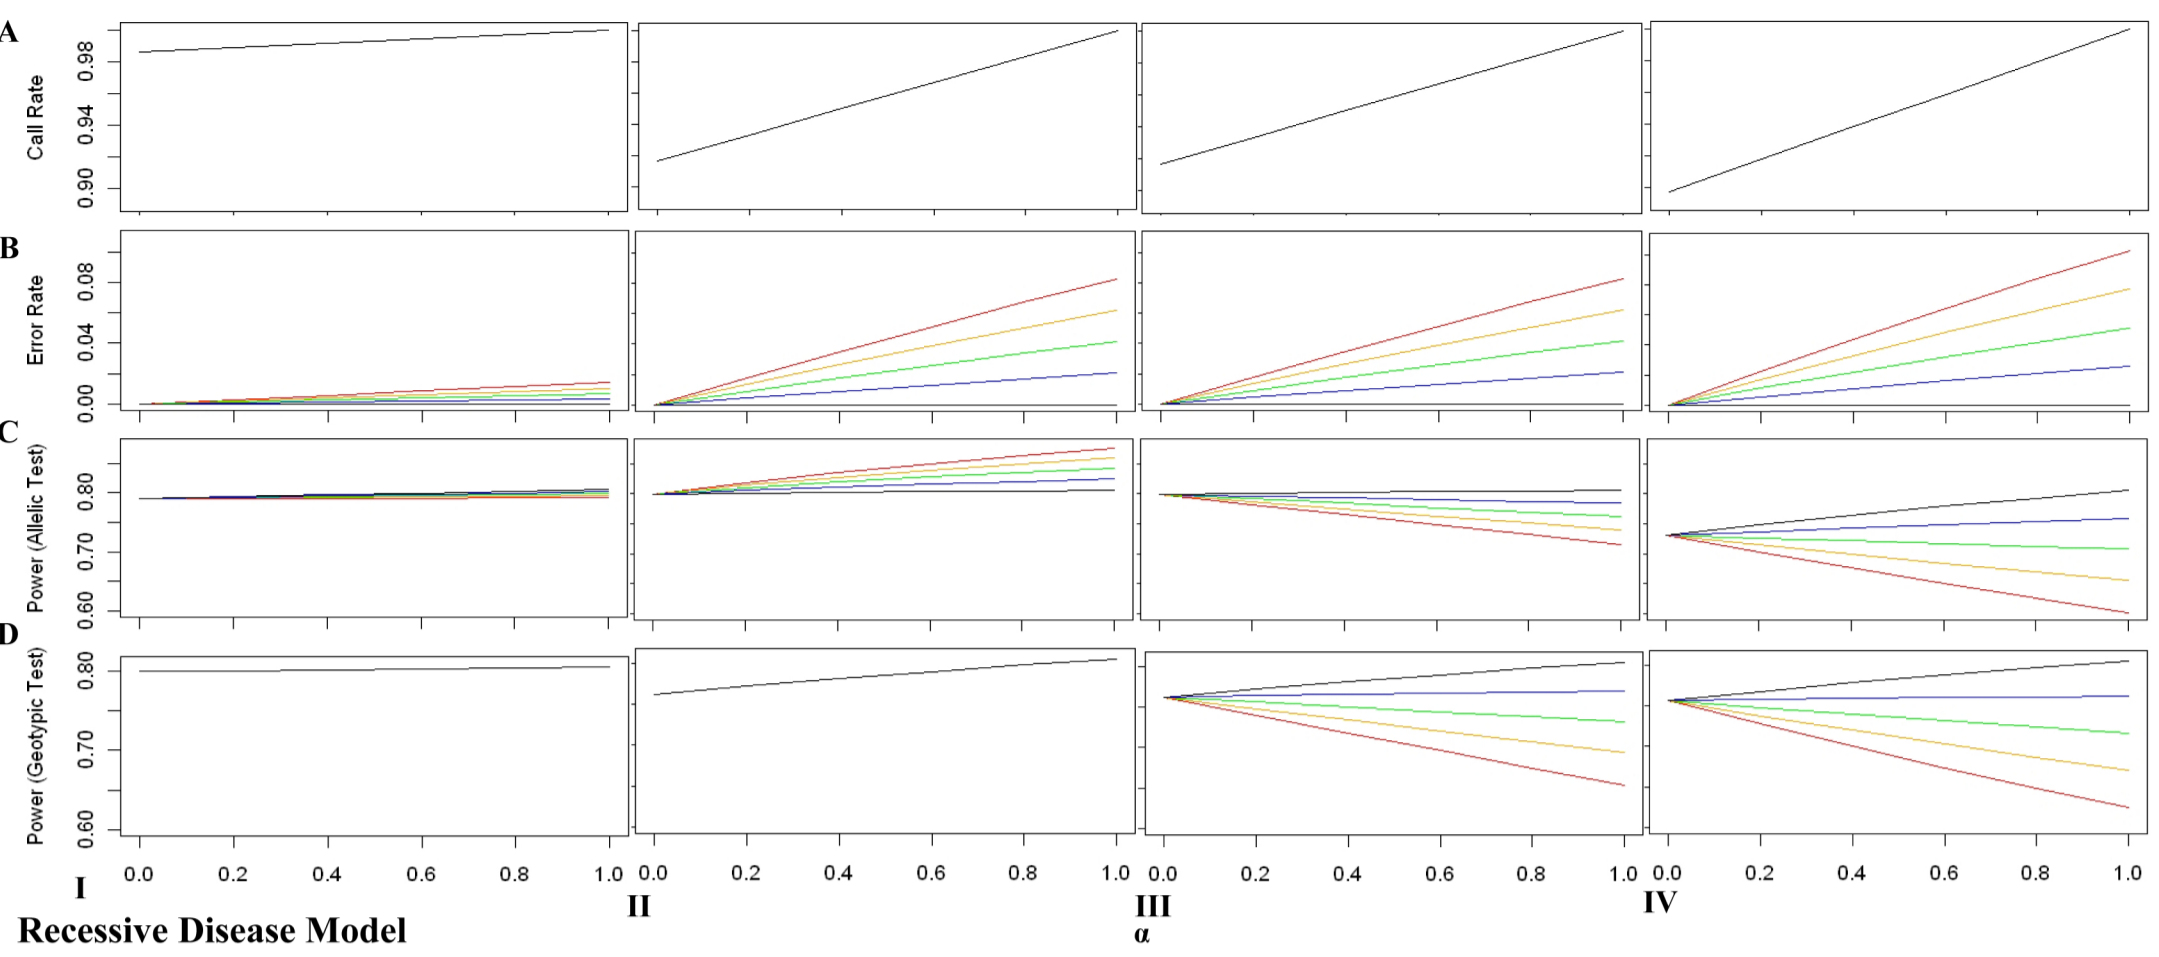

**Recessive Disease Model**

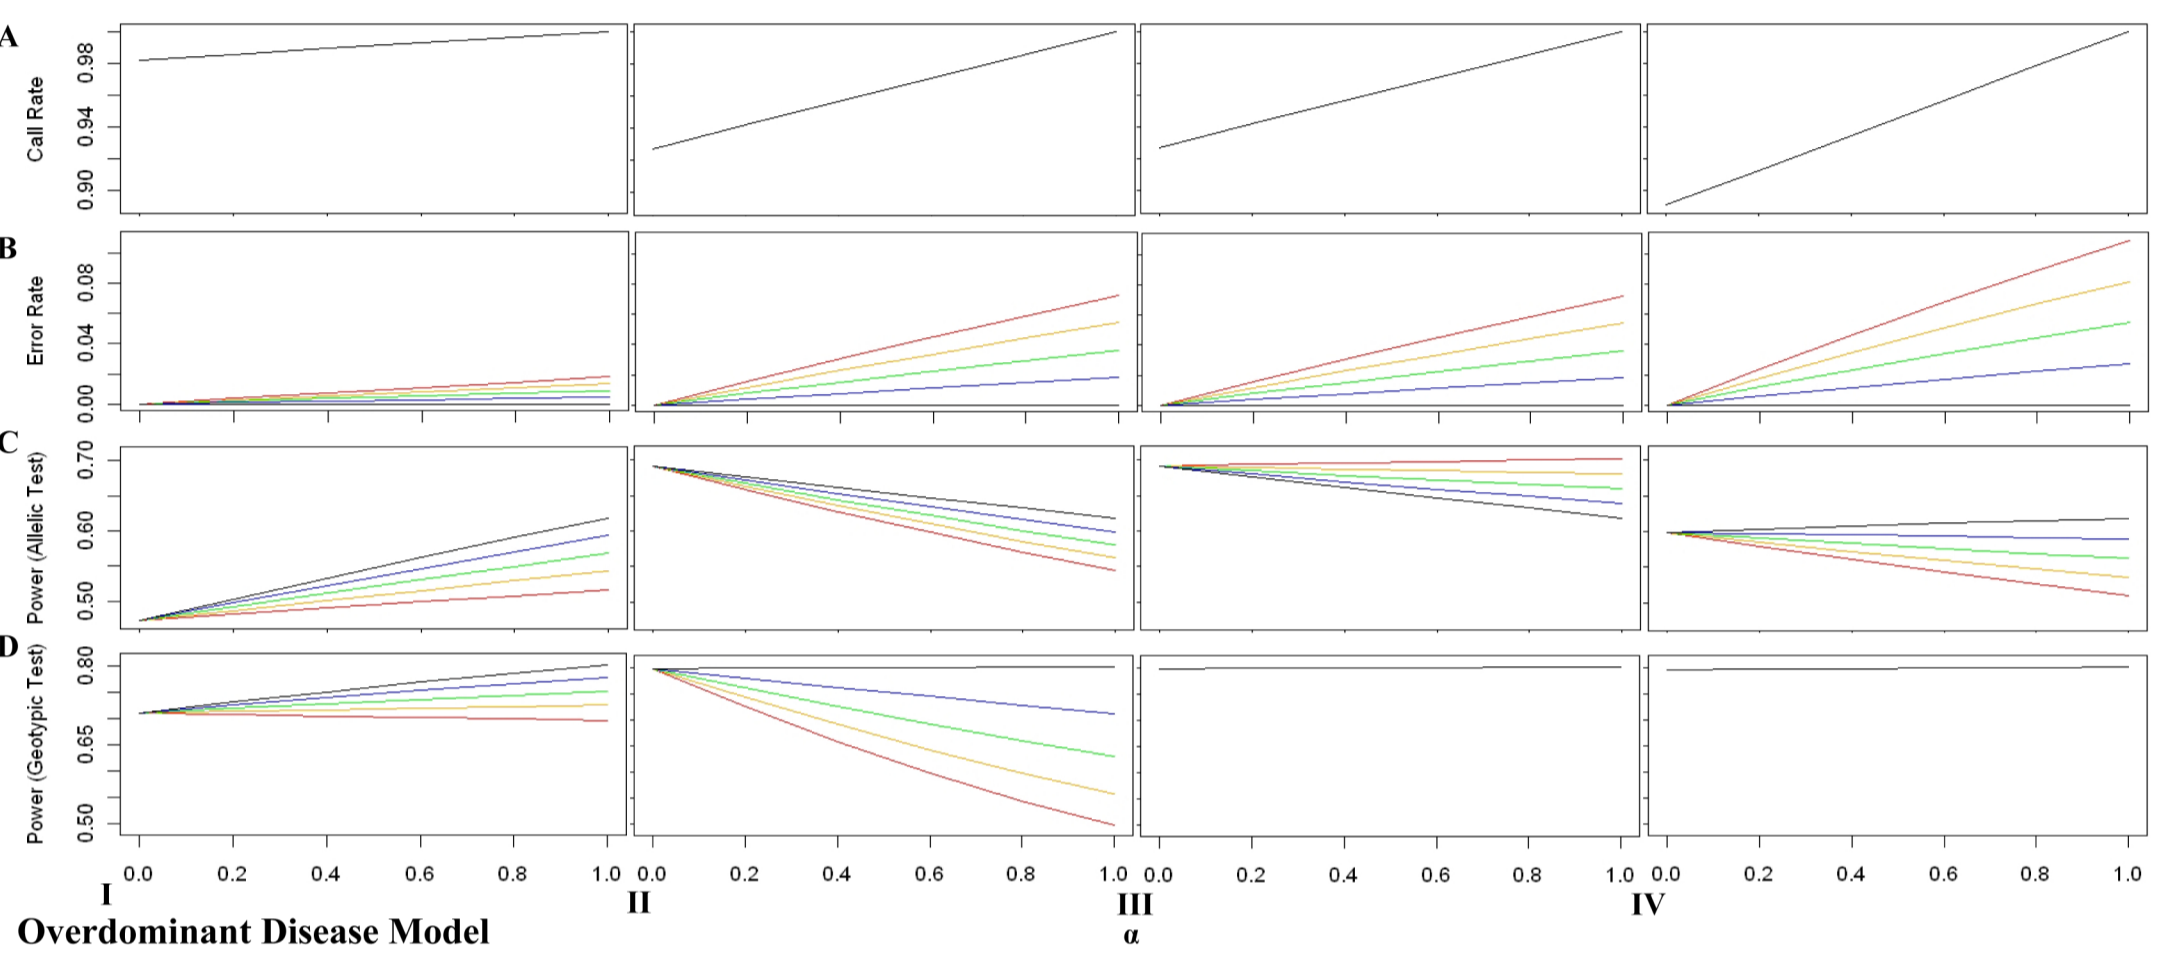

**Overdominant Disease Model**

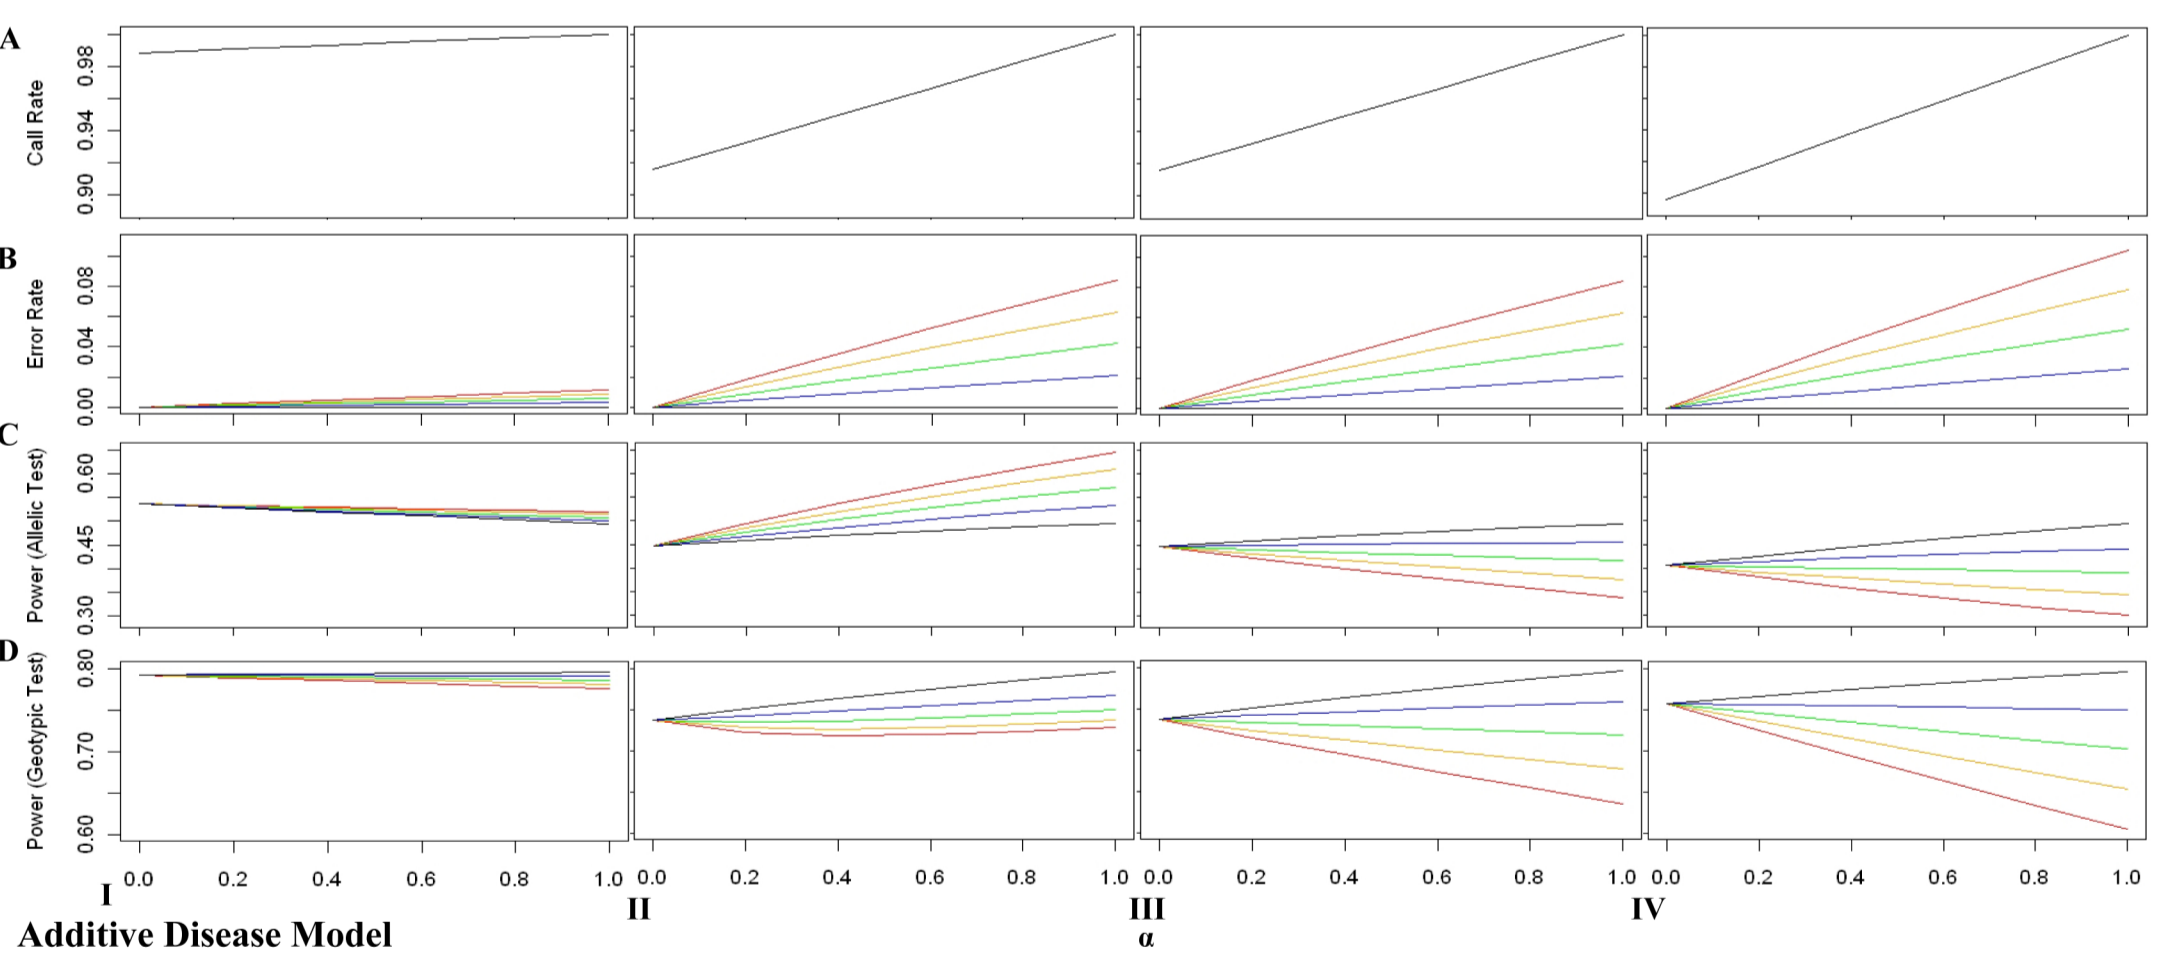

**Additive Disease Model**

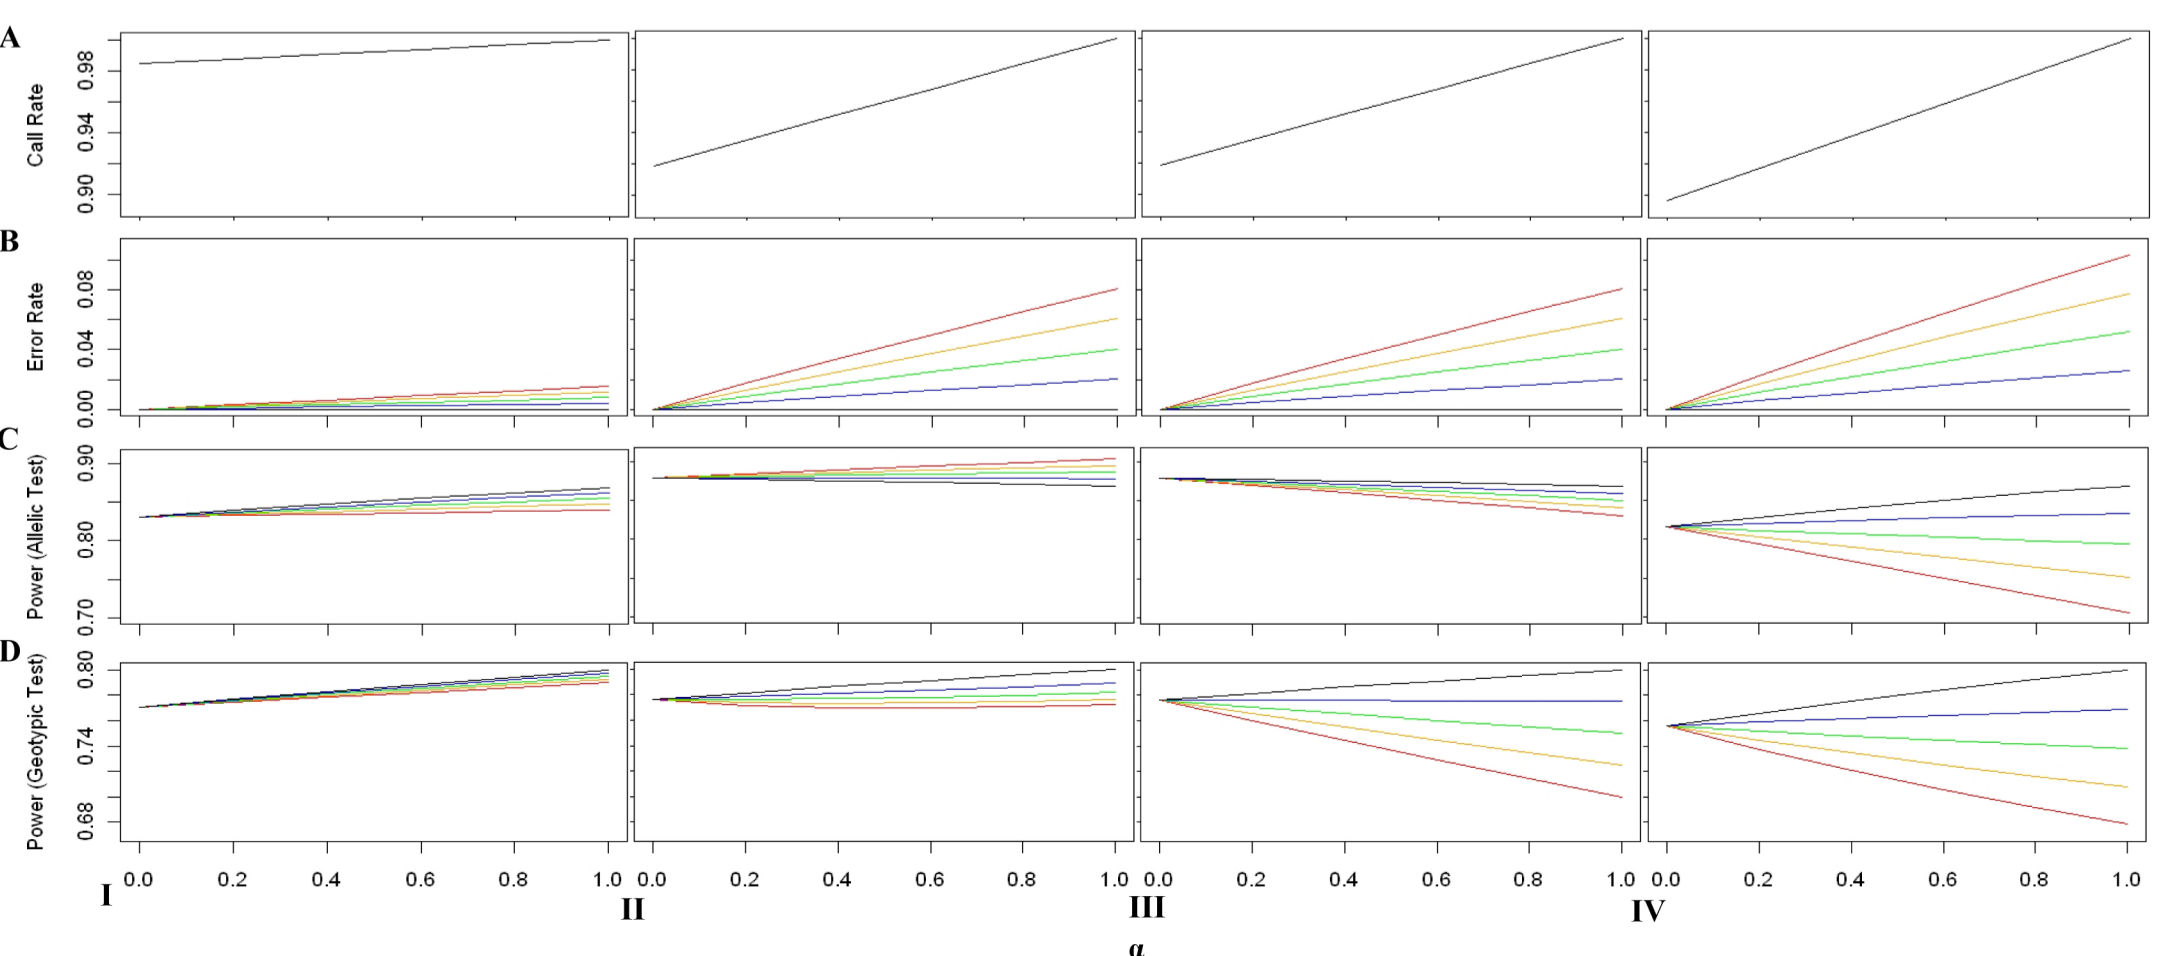

Supplement: 1471-2164-10-106-S6.pdf [file 1471-2164-10-106-S6.pdf]
