# Supplementary material for: Missing call bias in high-throughput genotyping
Source: BMC Genomics. 2009 Mar 13;10:106. doi: 10.1186/1471-2164-10-106 (PMC2670840; doi:10.1186/1471-2164-10-106)

## Dominant Disease Model

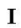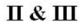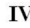

### Recessive Disease Model

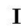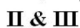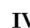

## Overdominant Disease Model

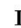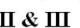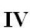

## Additive Disease Model

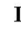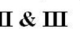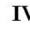

Supplement: Additional File 2 — The power comparison among the null (printed in green), UBM (printed in yellow) and MCB (printed in red) under various disease models (dominant, recessive, overdominant and additive relationship) in the significant level of 0.05 when genotypic χ2 test was used. The figures correspond to Scenario I, Scenario II & III and Scenario IV from the left to right. [file 1471-2164-10-106-S2.pdf]
